# Supplementary material
Source: MDPI journal article supplement (https://www.mdpi.com/2072-4292/14/14/3483)
Supplement: s1 [file s1]

Archive with 3 entries (3 files):
- Supplementary Material S1.pdf
- Supplementary Material S2.pdf
- Supplementary Material S3.pdf
