# Supplementary material
Source: MDPI journal article supplement (https://www.mdpi.com/2072-4292/14/14/3483)
Supplement: s1 [file s1]

## Supplementary Material S3: Variation over time of the non-cumulative FRP statistics every 12 hours and Maximum FRP every 24 hours

**Article:** A Near Real-Time and Free Tool for the Preliminary Mapping of Active Lava Flows during Volcanic Crises: The Case of Hotspot Subaerial Eruptions

Francisco Javier Vasconez <sup>1,\*</sup>, Juan Camilo Anzieta <sup>2,3</sup>, Anais Vásconez Müller <sup>1</sup>, Benjamin Bernard <sup>1</sup> and Patricio Ramón <sup>1</sup>

<sup>1</sup> Instituto Geofísico, Escuela Politécnica Nacional, Ladrón de Guevara E11-253, Quito 170525, Ecuador;  
fjvasconez@igepn.edu.ec (FJV); avasconez@igepn.edu.ec (AVM); bbernard@igepn.edu.ec (BB); pramon@igepn.edu.ec (PR)

<sup>2</sup> Department of Earth Sciences, Simon Fraser University, Surrey, BC V5A 1S6, Canada; janzieta@sfu.ca (JCA)

<sup>3</sup> Escuela de Ciencias Físicas y Matemática, Pontificia Universidad Católica del Ecuador, Quito 170525, Ecuador

\* Correspondence: fjvasconez@igepn.edu.ec

### A. FRP statistical analysis every 12 hours

#### 1. Wolf - 2015

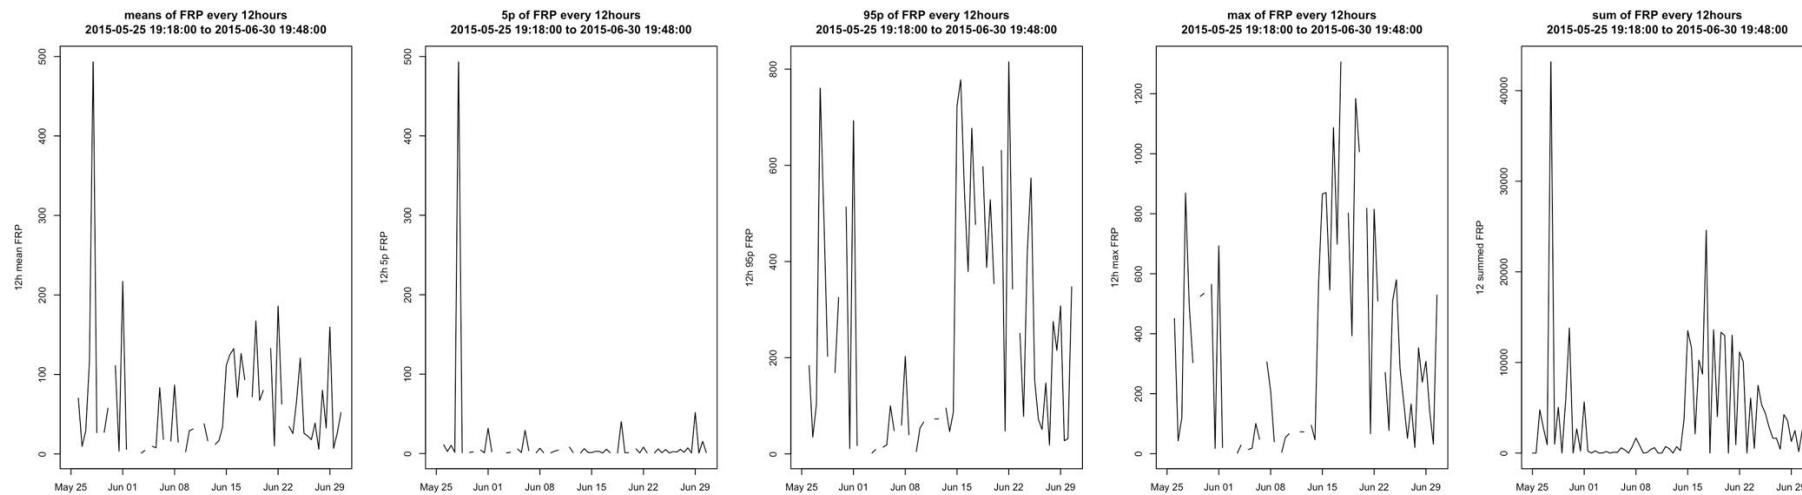

**Figure S3-1:** Variation over time of the FRP statistics (mean, the 5<sup>th</sup> and 95<sup>th</sup> percentiles, maximum and the sum) based on FRP data retrieved every 12 hours by the S-NPP satellite for Wolf volcano from 25 May to 05 July 2015.

## 2. Kilauea - 2018

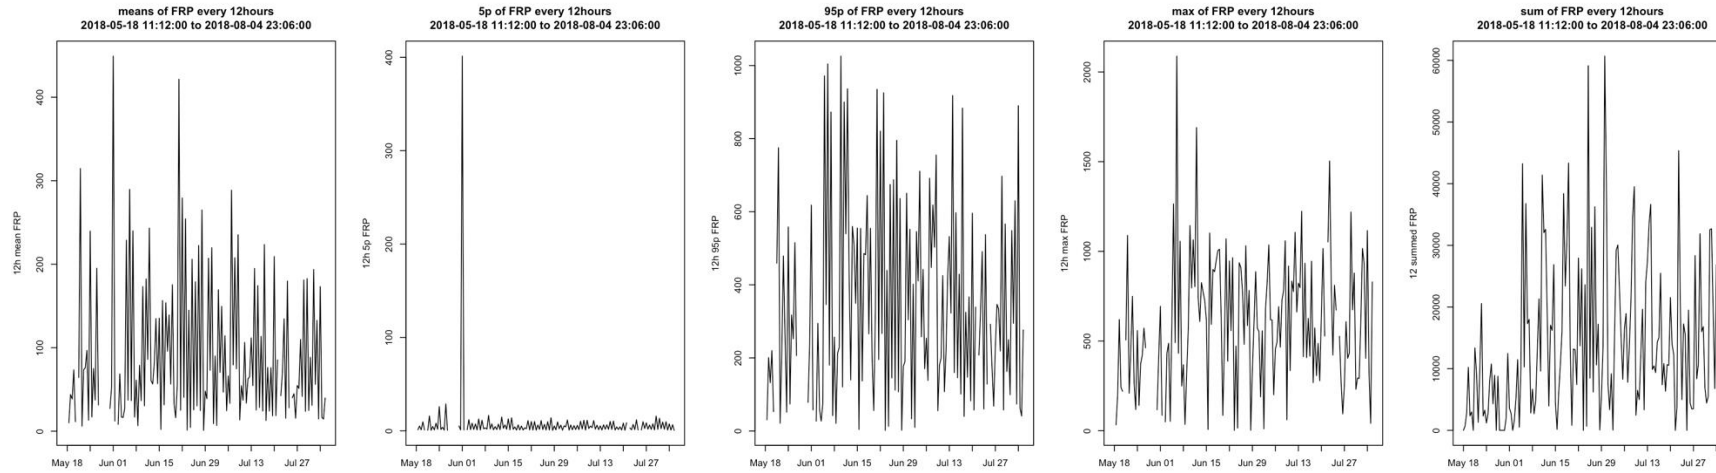

**Figure S3-2:** Variation over time of the FRP statistics (mean, the 5<sup>th</sup> and 95<sup>th</sup> percentiles, maximum and the sum) based on FRP data retrieved every 12 hours by the S-NPP satellite for Kilauea volcano from 18 May to 04 August 2018.

## 3. Sierra Negra – 2018

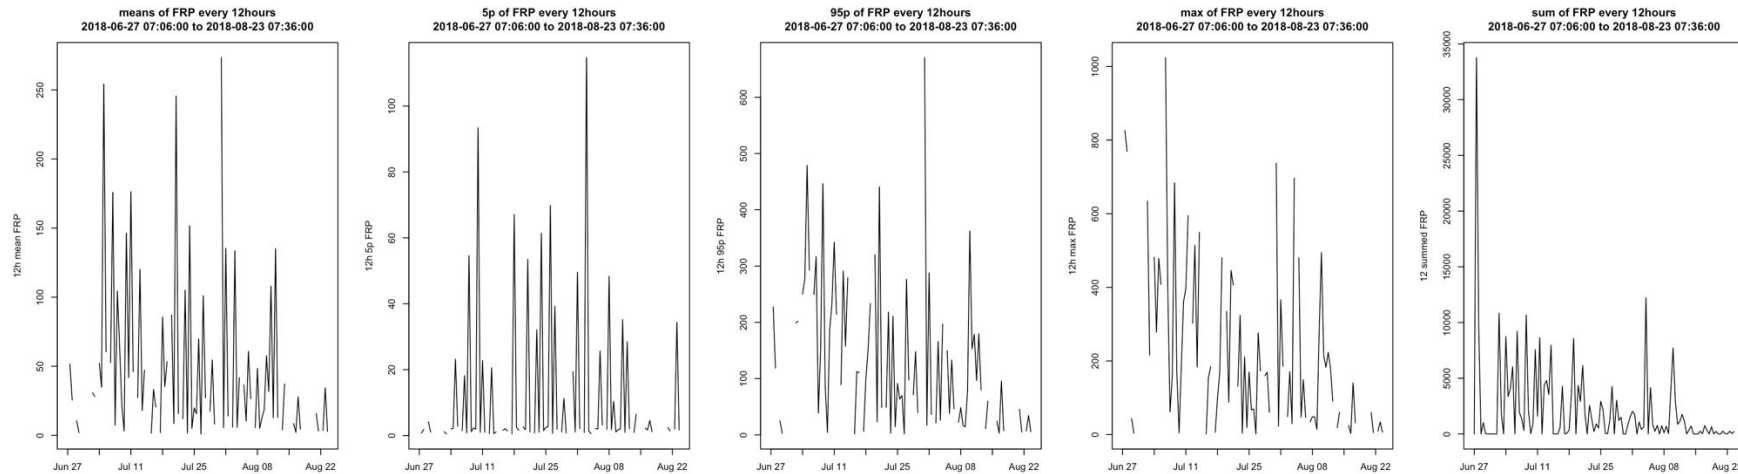

**Figure S3-3:** Variation over time of the FRP statistics (mean, the 5<sup>th</sup> and 95<sup>th</sup> percentiles, maximum and the sum) based on FRP data retrieved every 12 hours by the S-NPP satellite for Sierra Negra volcano from 27 June to 23 August 2018.

#### 4. Fagradalsfjall - 2021

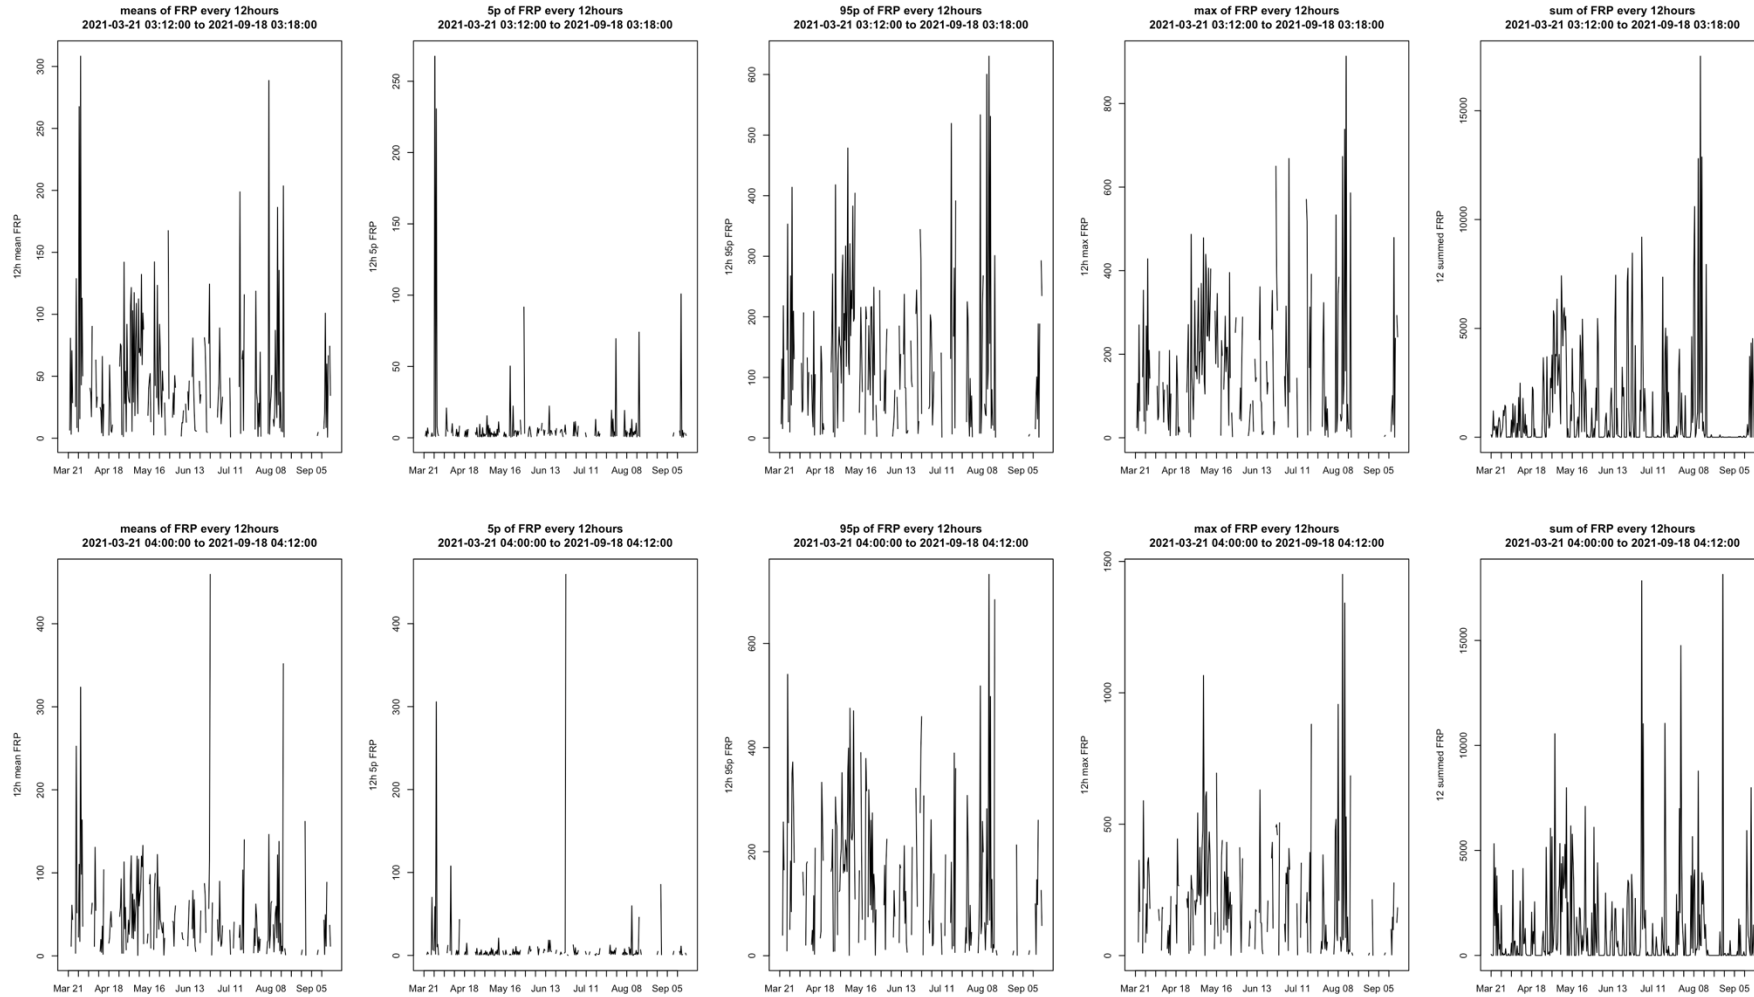

**Figure S3-4:** Variation over time of the FRP statistics (mean, the 5<sup>th</sup> and 95<sup>th</sup> percentiles, maximum and the sum) based on FRP data retrieved every 12 hours by the S-NPP (top) and NOAA-20 (bottom) satellites for Fagradalsfjall eruption from 21 March to 18 September 2021.

## 5. Cumbre Vieja - 2021

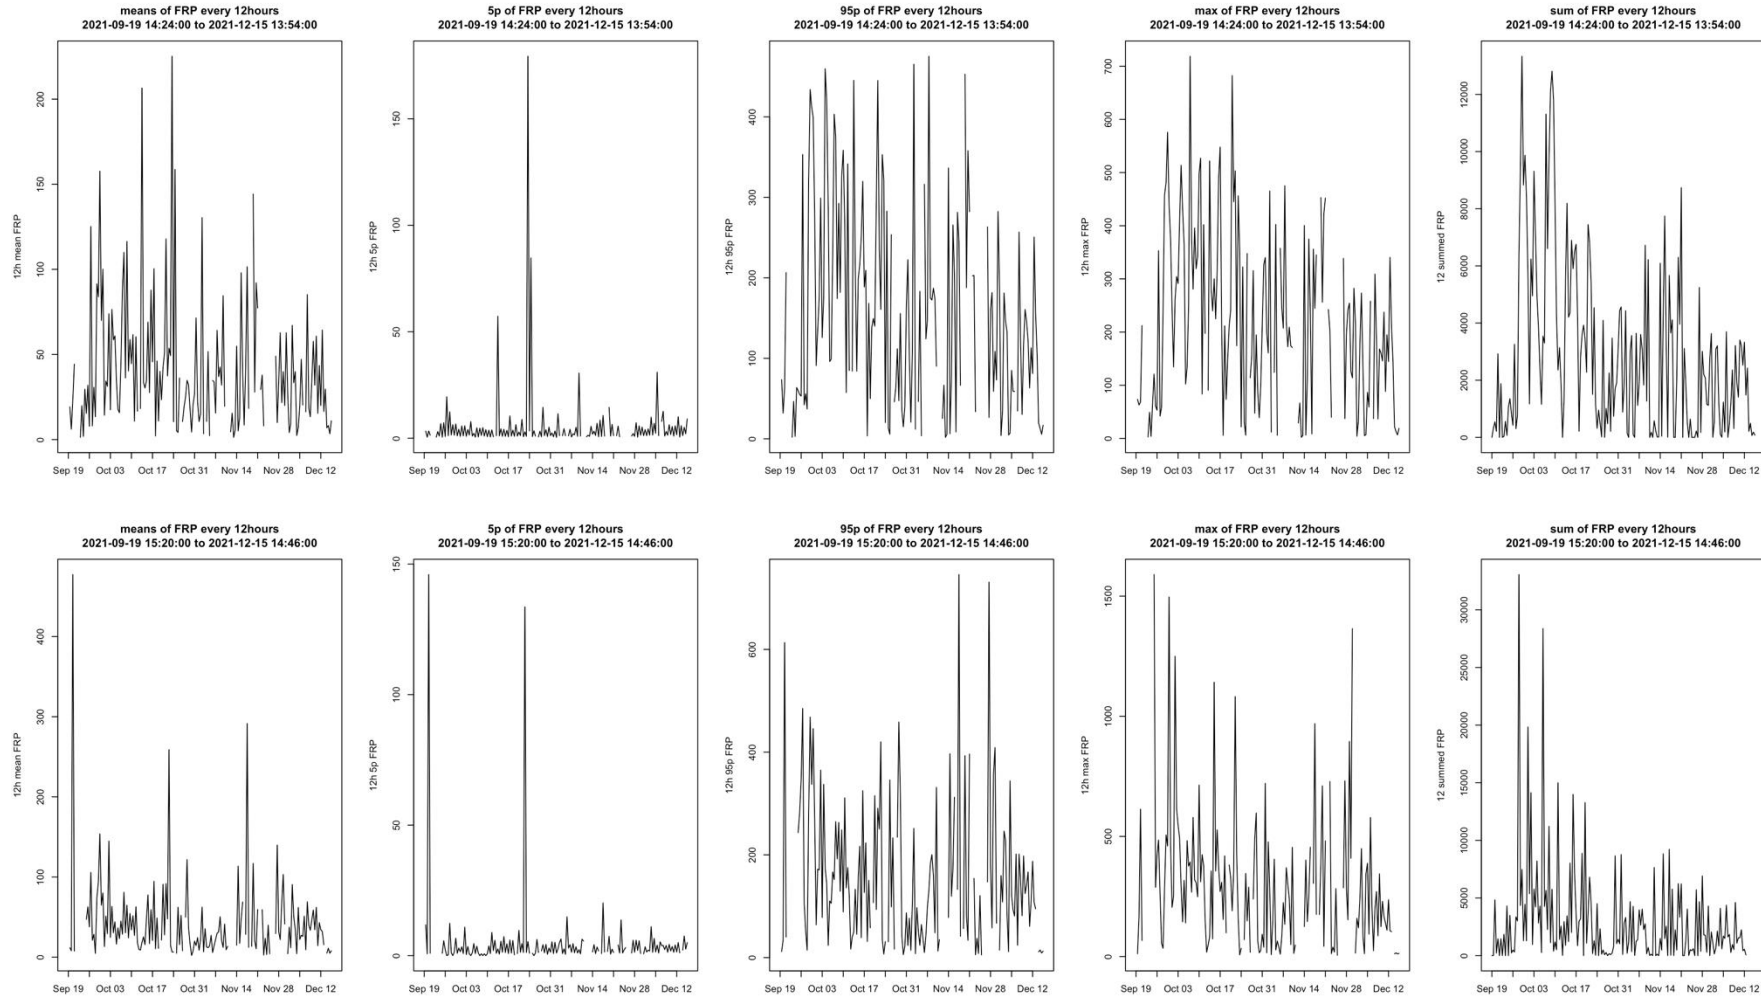

**Figure S3-5:** Variation over time of the FRP statistics (mean, the 5<sup>th</sup> and 95<sup>th</sup> percentiles, maximum and the sum) based on FRP data retrieved every 12 hours by the S-NPP (top) and NOAA-20 (bottom) satellites for Cumbre Vieja eruption from 19 September to 15 December 2021.

## 6. Wolf-2022

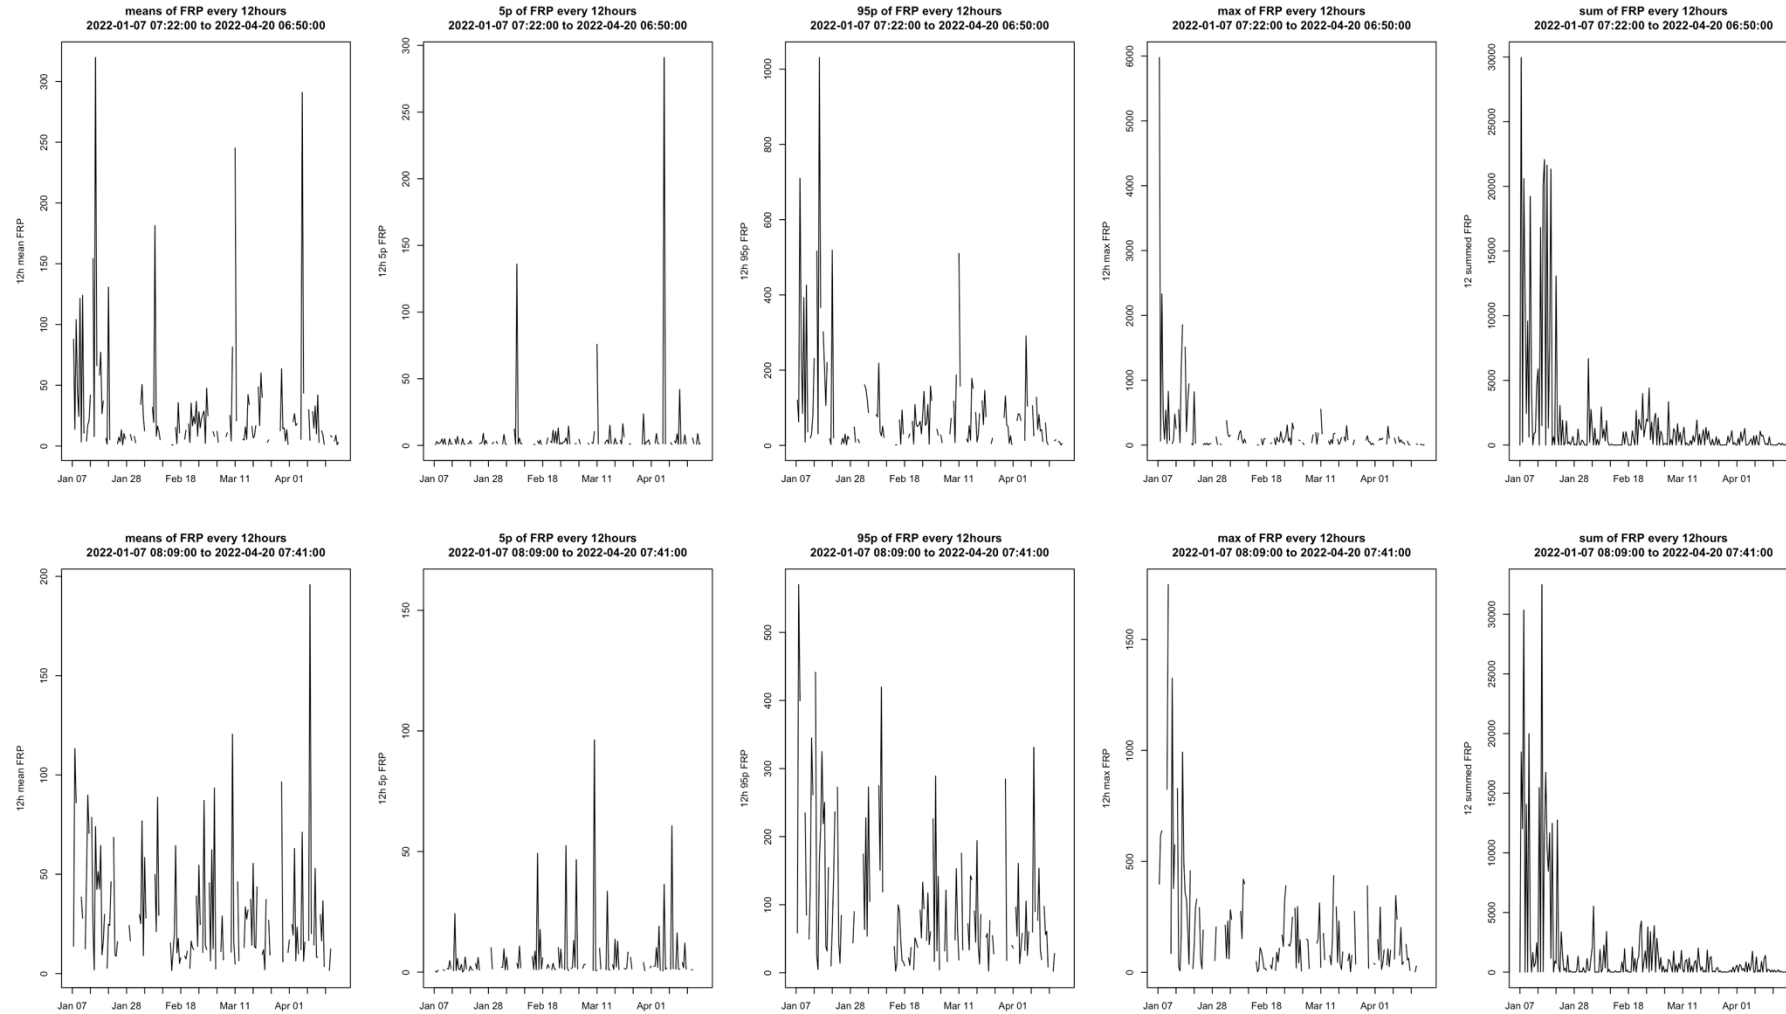

**Figure S3-6:** Variation over time of the FRP statistics (mean, the 5<sup>th</sup> and 95<sup>th</sup> percentiles, maximum and the sum) based on FRP data retrieved every 12 hours by the S-NPP (top) and NOAA-20 (bottom) satellites for Wolf volcano from 7 January to 20 April 2022.

## B. Maximum FRP every 24 hours: analysis of the end of the eruption

### 1. Wolf - 2015

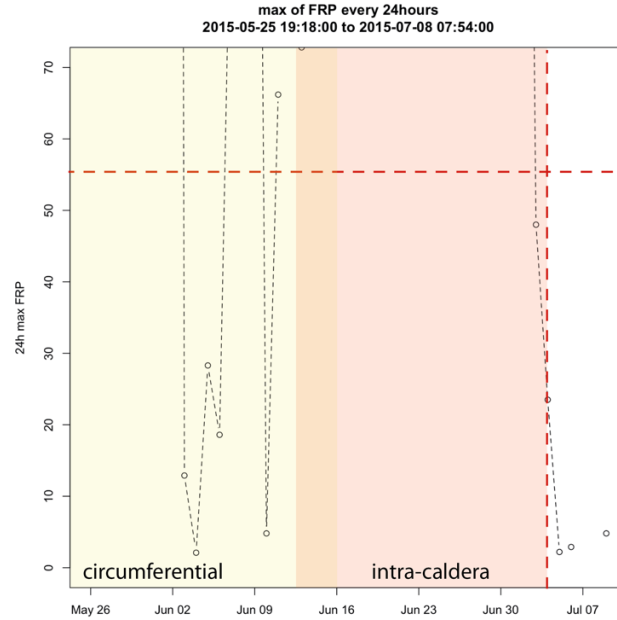

**Figure S3-7:** Variation over time of the maximum FRP every 24 hours by the S-NPP satellite. The red vertical line highlights the official end of the eruption and the horizontal line the mean FRP-filter. When more than two consecutive days have maximum FRP values below the FRP-filter a break in the eruptive activity or the end of an eruption pulse can be inferred. Colour backgrounds depict the two eruptive phases.

### 2. Kilauea - 2018

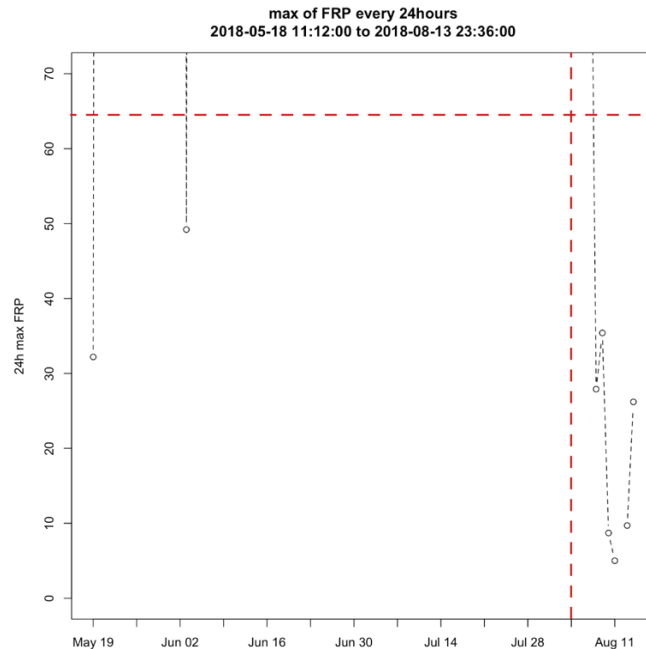

**Figure S3-8:** Variation over time of the maximum FRP every 24 hours by the S-NPP satellite. The red vertical line highlights the official end of the eruption and the horizontal line the mean FRP-filter. When more than two consecutive days have maximum FRP values below the FRP-filter a break in the eruptive activity or the end of an eruption pulse can be inferred.

### 3. Sierra Negra – 2018

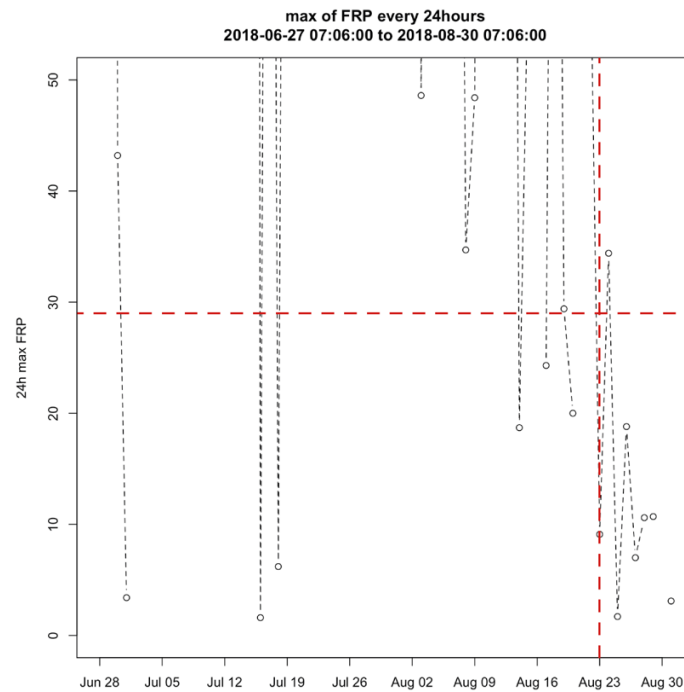

**Figure S3-9:** Variation over time of the maximum FRP every 24 hours by the S-NPP satellite. The red vertical line highlights the official end of the eruption and the horizontal line the mean FRP-filter. When more than two consecutive days have maximum FRP values below the FRP-filter a break in the eruptive activity or the end of an eruption pulse can be inferred.

### 4. Fagradalsfjall - 2021

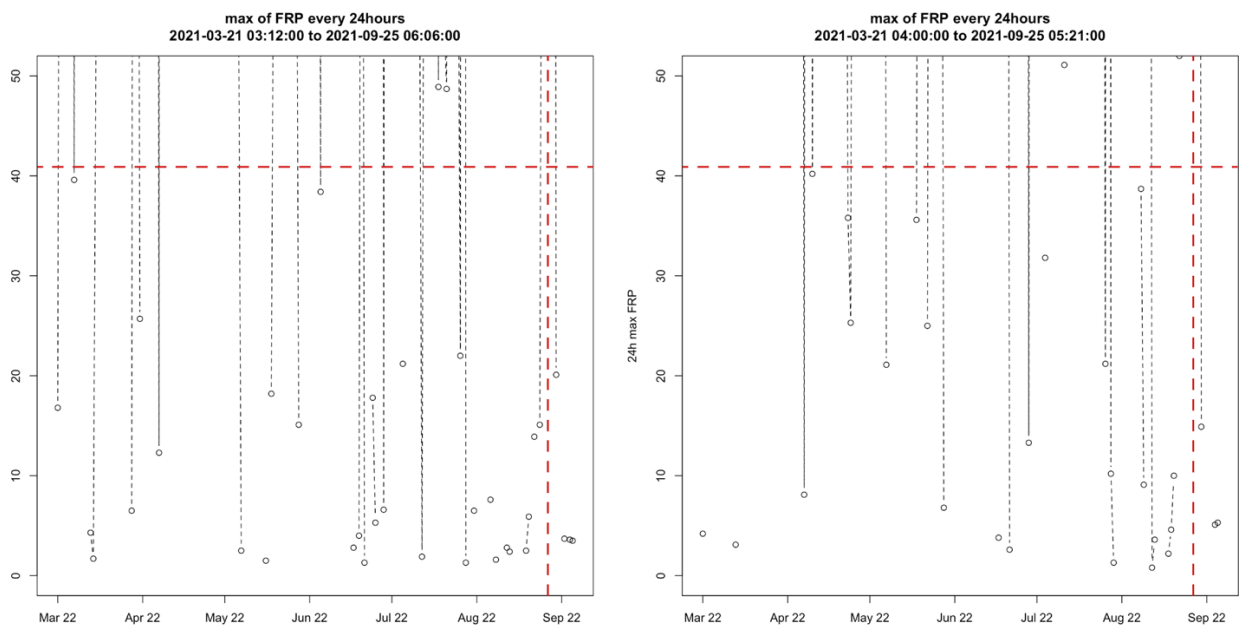

**Figure S3-10:** Variation over time of the maximum FRP every 24 hours by the S-NPP (left) and NOAA-20 (right) satellites. The red vertical line highlights the official end of the eruption and the horizontal line the mean FRP-filter. When more than two consecutive days have maximum FRP values below the FRP-filter a break in the eruptive activity or the end of an eruptive pulse can be inferred.

## 5. Cumbre Vieja - 2021

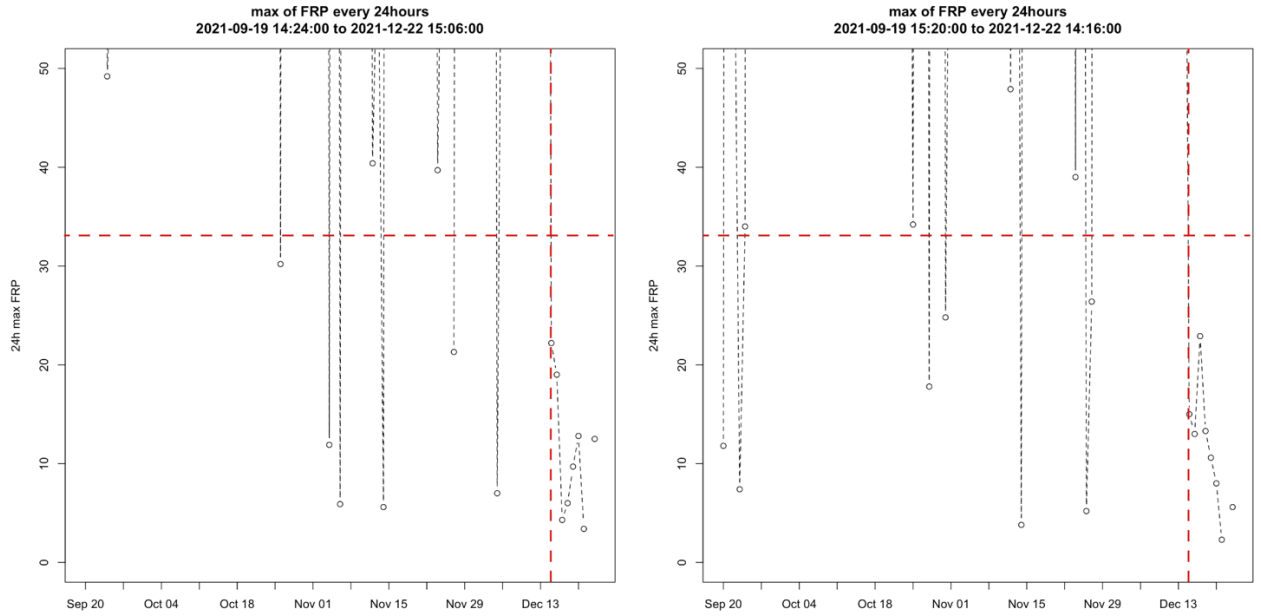

**Figure S3-11:** Variation over time of the maximum FRP every 24 hours by the S-NPP (left) and NOAA-20 (right) satellites. The red vertical line highlights the official end of the eruption and the horizontal line the mean FRP-filter. When more than two consecutive days have maximum FRP values below the FRP-filter a break in the eruptive activity or the end of an eruptive pulse can be inferred.

## 6. Wolf-2022

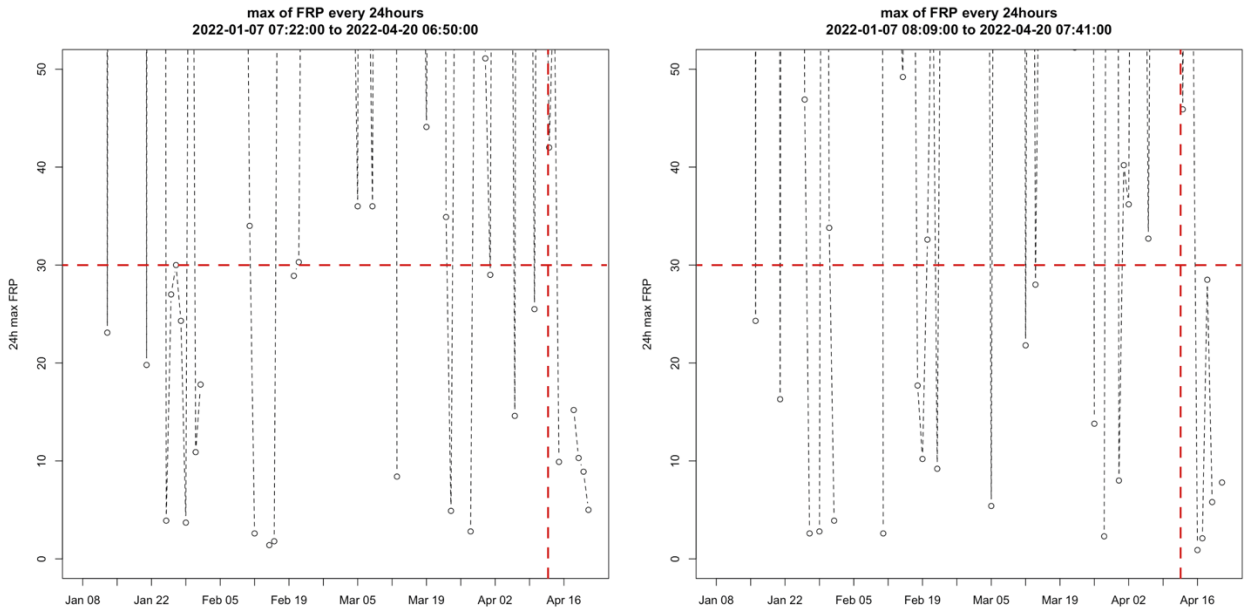

**Figure S3-12:** Variation over time of the maximum FRP every 24 hours by the S-NPP (left) and NOAA-20 (right) satellites. The red vertical line highlights the official end of the eruption and the horizontal line the mean FRP-filter. When more than two consecutive days have maximum FRP values below the FRP-filter a break in the eruptive activity or the end of an eruptive pulse can be inferred.
